# Supplementary material for: From understanding the formation mechanism to enhanced supercapacitor performance of VSB-5 with a hierarchical structure
Source: Royal Society of Chemistry journal article supplement (doi:10.1039/c7ta04857b), 2017-01-01
Supplement: c7ta04857b1.pdf [file c7ta04857b1.pdf]

## Supplementary Information

### From understanding the formation mechanism to enhanced supercapacitor performance of VSB-5 with hierarchical structure

Yue Zhang, Rudan Hu, Feng Wen, Jianli Zhang, Yining Wang, Richao Niu, Xin Wang, and Junwu Zhu\*.

Key Laboratory for Soft Chemistry and Functional Materials (Nanjing University of Science and Technology), Ministry of Education, Nanjing 210094, China.

\*To whom correspondence should be addressed. E-mail: zhujw@njust.edu.cn.

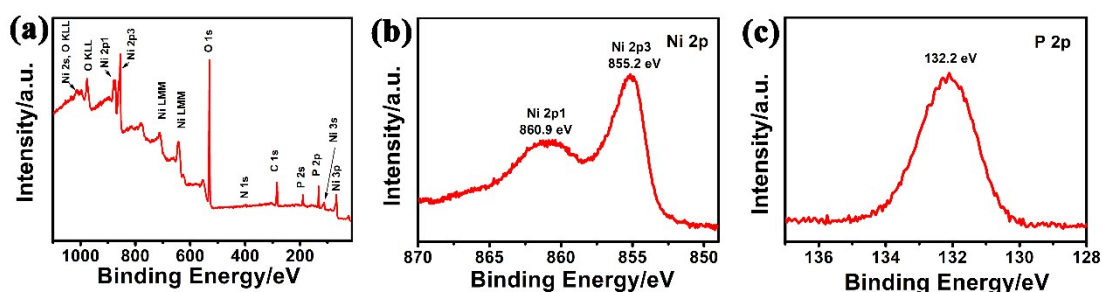

Fig. S1 XPS spectra of NP<sub>3.5</sub>: (a) complete survey, (b) Ni 2p, and (c) p 2p.

As shown in Fig. S1a, the complete survey indicates that Ni, P, O and N elements in NP<sub>3.5</sub> can be detected. The weak peak of N for NP<sub>3.5</sub> may be due to the adsorption of aqueous ammonia. The XPS spectra of Ni 2p and P 2p of NP<sub>3.5</sub> are shown in Fig. S1b,c.

Table S1 XPS atomic percentage of elements observed on the surface of NP<sub>3.5</sub>.

| Element  | Ni 2p <sub>3</sub> | P 2p | O 1s | N 1s |
|----------|--------------------|------|------|------|
| Atomic % | 30.7               | 8.4  | 59.3 | 1.6  |

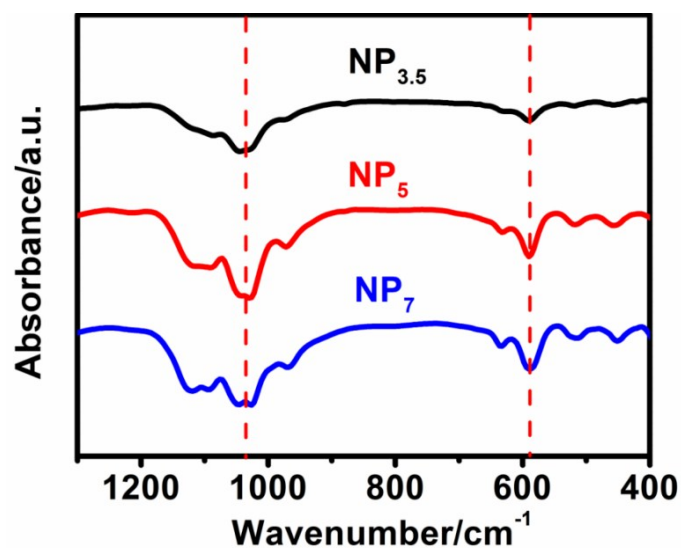

**Fig. S2** FTIR spectra of NP<sub>3.5</sub>, NP<sub>5</sub>, and NP<sub>7</sub>.

In Fig. S2, the FTIR spectra of NP<sub>3.5</sub>, NP<sub>5</sub>, and NP<sub>7</sub> have similar absorption bands around 1049 cm<sup>-1</sup> and 586 cm<sup>-1</sup> (as indicated by the red dashed lines), and these bands could be attributed to the presence of PO<sub>4</sub><sup>3-</sup>. Besides, bands around 111 cm<sup>-1</sup>, 1026 cm<sup>-1</sup>, 968 cm<sup>-1</sup>, 636 cm<sup>-1</sup>, 516 cm<sup>-1</sup> and 455 cm<sup>-1</sup> can be assigned to HPO<sub>4</sub><sup>2-</sup>. Since the HPO<sub>4</sub><sup>2-</sup> is only existence in VSB-5, it can be speculated that all of the three substance contain VSB-5.

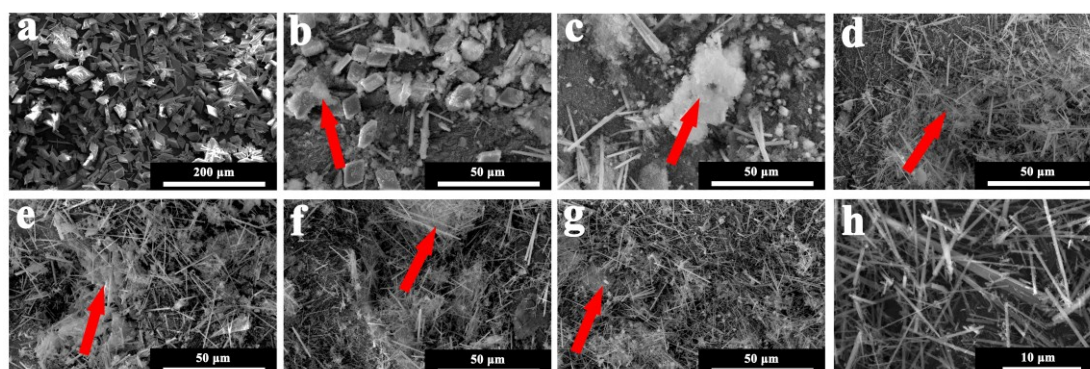

**Fig. S3** SEM images of the nickel phosphates obtained with different adding amount aqueous ammonia: (a) 0.4 mL, (b) 0.8 mL, (c) 1 mL, (d) 1.2 mL, (e) 2 mL, (f) 3.5 mL, (g) 5 mL, and (h) 7 mL.

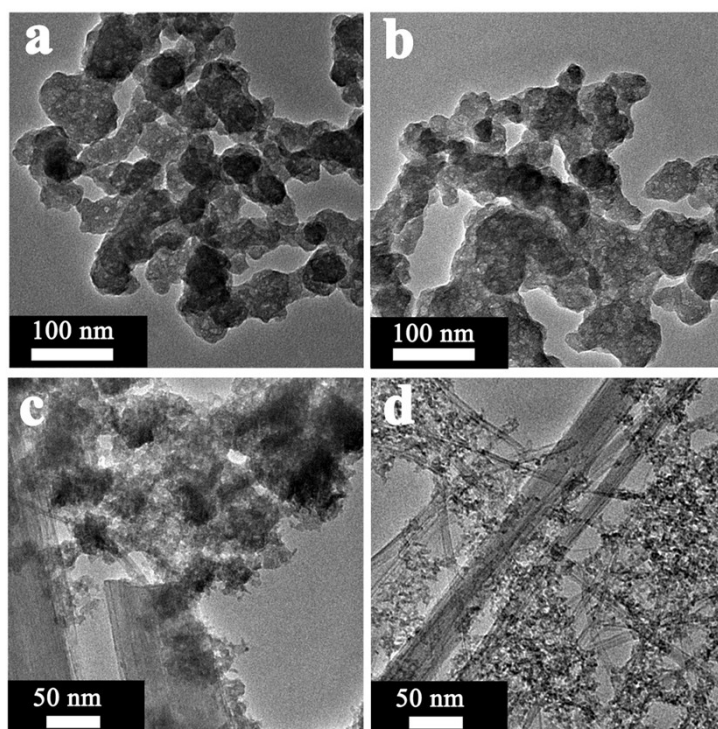

**Fig. S4** TEM images of (a)  $NP_{0.8}$ , (b)  $NP_1$ , (c)  $NP_{3.5}$ , and (d)  $NP_5$ . The amorphous part was selected as the main characterization area.

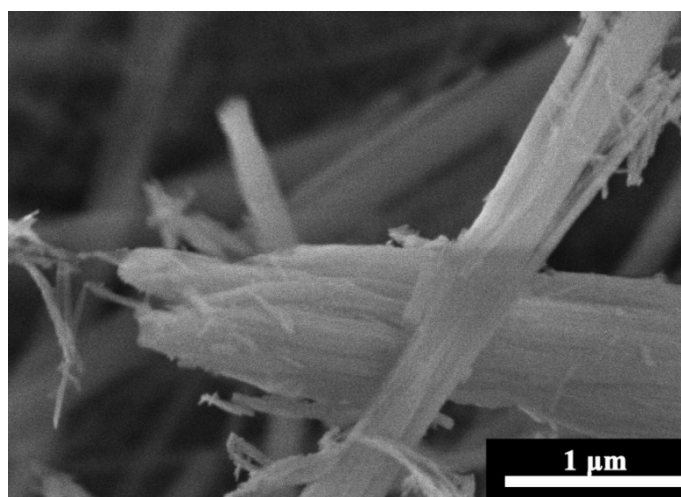

**Fig. S5** SEM image of rod-like VSB-5 ( $NP_7$ ).

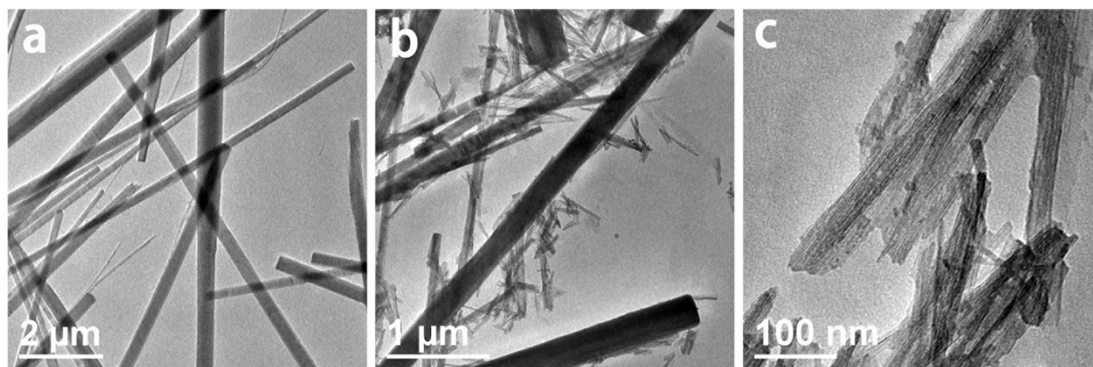

Fig. S6 TEM images of NP<sub>7</sub>: (a) before , (b) and (c) after ultrasonication for 5h.

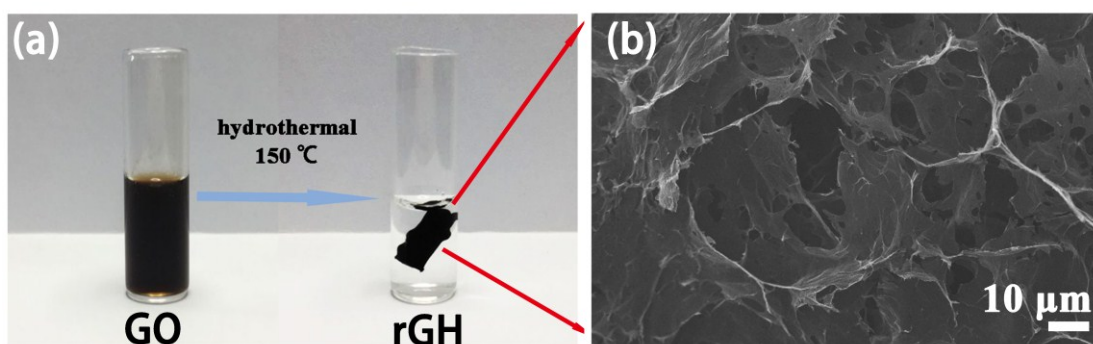

Fig. S7 (a) photograph of GO and rGH. (b) SEM image of 3D rGH.

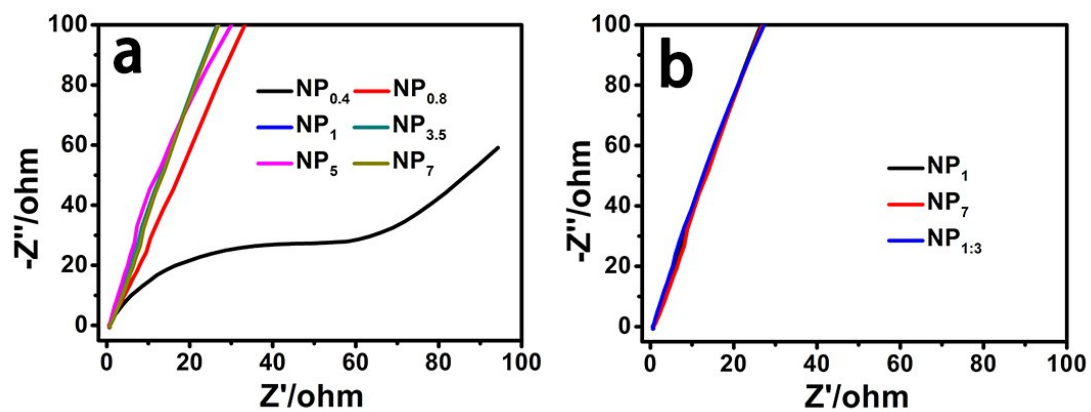

Fig. S8 Nyquist plots of the nickel phosphates: (a) NP<sub>0.4</sub>, NP<sub>0.8</sub>, NP<sub>1</sub>, NP<sub>3.5</sub>, NP<sub>5</sub>, NP<sub>7</sub>, and (b) NP<sub>1</sub>, NP<sub>7</sub>, NP<sub>1:3</sub>.

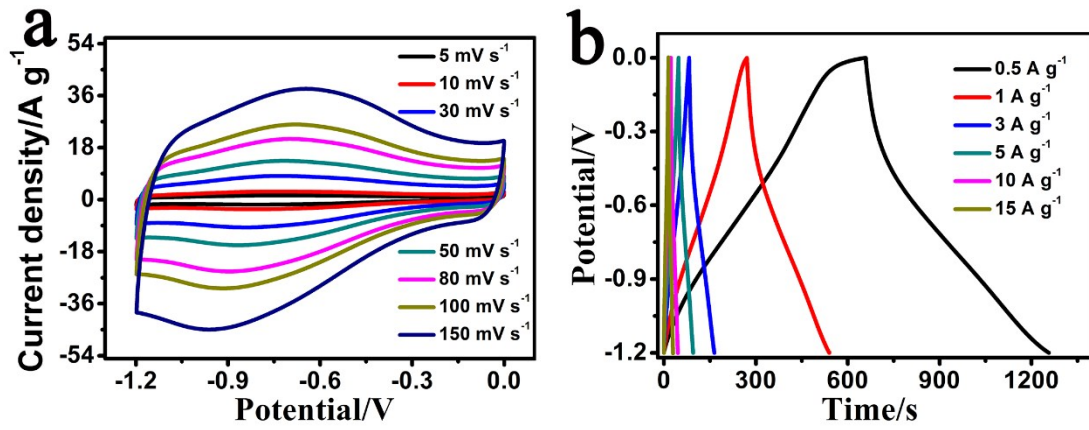

Fig. S9 (a) CV curves and (b) galvanostatic charge-discharge curves of rGH in a three-electrode system with 6 M KOH aqueous.

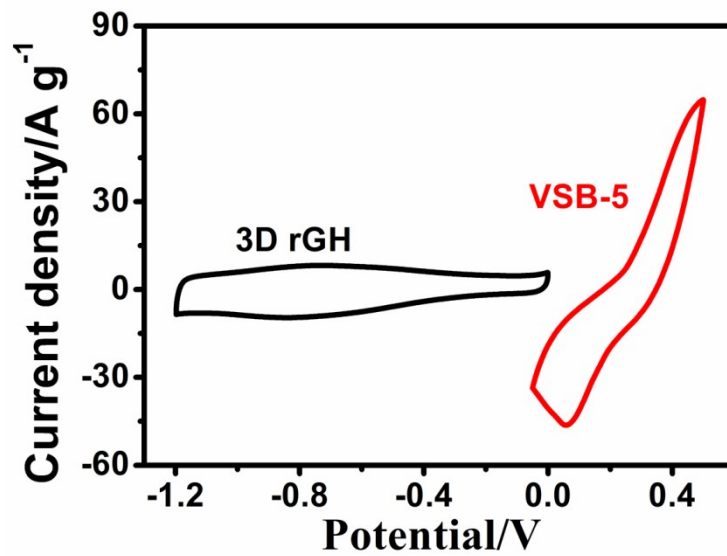

Fig. S10 CV curves of NP<sub>7</sub> and rGH at a scan rate of 30 mV s<sup>-1</sup> in a three-electrode system with 6 M KOH aqueous.

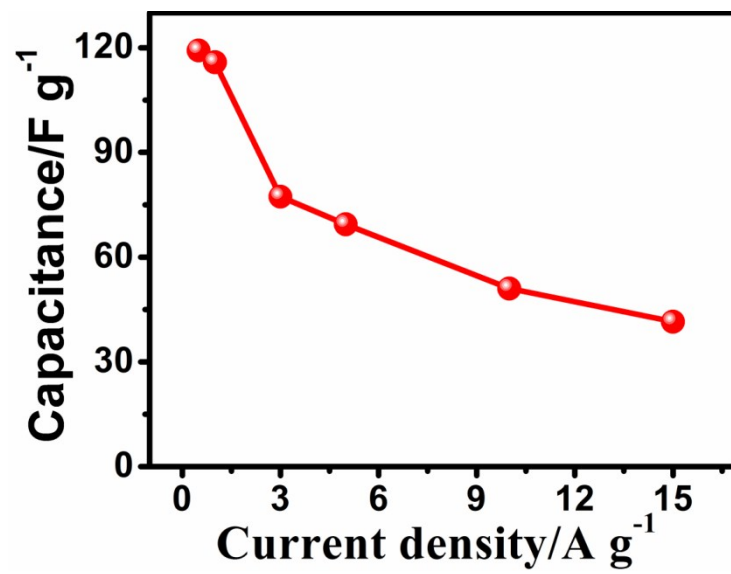

Fig. S11 The rate capability of HSC NP<sub>7</sub>//rGH.
